# Supplementary material
Source: PubMed Central journal article supplement (PMC6519963)
Supplement: NIHMS1511524-supplement-1.pdf [file NIHMS1511524-supplement-1.pdf]

## List of Supplementary Items

Fig. 1: Raw immunoblot scans

Table 1: List of primers used in PCR analysis

Table 2: List of antibodies

Table 3: List of expressed L1 elements identified by long range RT-PCR  
Excel file: Table\_S3.xlsx

Table 4a: Gene list used in GSEA for SASP (85 genes)

Table 4b: Gene list used in GSEA for IFN-I (50 genes)  
Excel file: Table\_S4.xlsx

Table 5a: GSEA analysis of KEGG pathways comparing early passage with early senescence

Table 5b: GSEA analysis of KEGG pathways comparing early passage with late senescence

Table 5c: GSEA analysis of KEGG pathways comparing early senescence with late senescence  
Excel file: Table\_S5.xlsx

Table 6: Summary of Qiagen PCR array analysis

Table 7: Summary of mouse tissue RT-qPCR data for L1, p16, IFN-I and SASP genes  
Excel file: Table\_S7.xlsx

**Supplementary Table 1: List of primers used in PCR analysis<sup>1</sup>**

| Number        | Designation                                         | Sequence                                                                 | Notes                                                                                                                                                                                                                                                                                                                                                                                                                                                                                 |
|---------------|-----------------------------------------------------|--------------------------------------------------------------------------|---------------------------------------------------------------------------------------------------------------------------------------------------------------------------------------------------------------------------------------------------------------------------------------------------------------------------------------------------------------------------------------------------------------------------------------------------------------------------------------|
| Primer set 1  | MDL15UTRPRAF<br>MDL15UTRPRAR<br>Amplicon A, Fig. 1b | GCCAAGATGGCCGAATAGGA<br>AAATCACCCGTCTTCTGCGT                             | LINE-1 5'UTR, positions 12-31, sense orientation <sup>2</sup> .<br>LINE-1 5'UTR, positions 64-83, antisense orientation <sup>2</sup> .<br>Used in RT-qPCR experiments to assess expression of L1Hs RNA. Also used in ChIP experiments.                                                                                                                                                                                                                                                |
| Primer set 2  | MDL15UTRBF<br>MDL15UTRBR<br>Amplicon B, Fig. 1b     | CGAGATCAAACGTCAAGGCG<br>CCGGCCGCTTTGTTTACCTA                             | LINE-1 5'UTR, positions 402-421, sense orientation <sup>2</sup> .<br>LINE-1 5'UTR, positions 454-473, antisense orientation <sup>2</sup> .<br>Used in RT-qPCR experiments to assess expression of L1Hs RNA. Also used in ChIP experiments.                                                                                                                                                                                                                                            |
| Primer set 3  | MDL15UTRCF<br>MDL15UTRCR<br>Amplicon C, Fig. 1b     | TAAACAAGCGCCGGGAA<br>AGAGGTGGAGCCTACAGAGG                                | LINE-1 5'UTR, positions 474-492, sense orientation <sup>2</sup> .<br>LINE-1 5'UTR, positions 530-549, antisense orientation <sup>2</sup> .<br>Used in RT-qPCR experiments to assess expression of L1Hs RNA. Also used in ChIP experiments.                                                                                                                                                                                                                                            |
| Primer set 4  | MDL15UTRDF<br>MDL15UTRDR<br>Amplicon D, Fig. 1b     | AGAGAGCAGTGGTTCTCCCA<br>CAGTCTGCCGTTCTCAGAT                              | LINE-1 5'UTR, positions 619-638, sense orientation <sup>2</sup> .<br>LINE-1 5'UTR, positions 647-666, antisense orientation <sup>2</sup> .<br>Used in RT-qPCR experiments to assess expression of L1Hs RNA. Also used in ChIP experiments.                                                                                                                                                                                                                                            |
| Primer set 5  | MDL1ORF1F<br>MDL1ORF1R<br>Amplicon E, Fig. 1b       | ACCTGAAAGTGACGGGGAGA<br>CCTGCCTTGCTAGATTGGGG                             | LINE-1 ORF1, positions 1395-1414, sense orientation <sup>2</sup> .<br>LINE-1 ORF1, positions 1508-1527, antisense orientation <sup>2</sup> .<br>Used in RT-qPCR experiments to assess expression of L1Hs RNA. Also used in ChIP experiments.                                                                                                                                                                                                                                          |
| Primer set 6  | ORF2F<br>ORF2R<br>ORF2 probe<br>Amplicon F, Fig. 1b | CAAACACCGCATATTCTCACTCA<br>CTTCCTGTGTCATGTGATCTCA<br>AGGTGGGAATTGAAC-VIC | LINE-1 ORF2, positions 5731-5753, sense orientation <sup>2</sup> .<br>LINE-1 ORF2, positions 5772-5794, antisense orientation <sup>2</sup> .<br>Probe for TaqMan experiments.<br>ORF2F and ORF2R were used in SYBR Green RT-qPCR experiments to assess expression of L1Hs RNA, and in conjunction with the ORF2 probe in TaqMan qPCR experiments on genomic DNA to determine relative copy numbers of L1Hs elements. Primers were developed and validated as described <sup>3</sup> . |
| Primer set 7  | 5SF<br>5SR<br>5S probe                              | CTCGTCTGATCTCGGAAGCTAAG<br>GCGGTCTCCCATCCAAGTAC<br>AGGGTCGGGCCTGG-6FAM   | Ribosomal 5S RNA gene, sense orientation.<br>Ribosomal 5S RNA gene, antisense orientation.<br>Probe for TaqMan experiments.<br>Used for internal normalization, in conjunction with primer set 3, in TaqMan qPCR experiments on genomic DNA to determine relative copy numbers of L1Hs elements. Primers were developed and validated as described <sup>3</sup> .                                                                                                                     |
| Primer set 8  | GAPDHFV<br>GAPDHRV                                  | TTGAGGTCAATGAAGGGGTC<br>GAAGGTGAAGTCCGAGTCA                              | <i>GAPDH</i> , sense orientation.<br><i>GAPDH</i> , antisense orientation.<br>Used for RT-qPCR of the mRNA of the <i>GAPDH</i> gene (NM_001256799). Primers span an intron. Used as the internal normalizer in gene expression experiments.                                                                                                                                                                                                                                           |
| Primer set 9  | GAPDHINT4F<br>GAPDHINT4R                            | CCAGGAGTGAGTGAAGACAG<br>CTAGTTGCCCCCCAAAGCA                              | Intron 4 of <i>GAPDH</i> , sense orientation.<br>Intron 4 of <i>GAPDH</i> , antisense orientation.<br>Used as a negative control in ChIP experiments.                                                                                                                                                                                                                                                                                                                                 |
| Primer set 10 | ACP1IFNAFW<br>ACP1IFNARV1<br>ACP1IFNARV2            | TTGATGGCAACCAGTTCCAG<br>TCATCCAAGCAGCAGATGA<br>TGTTCCAAGCAGCAGATGA       | Interferon alpha consensus, sense orientation.<br>Interferon alpha consensus, antisense orientation.<br>Interferon alpha consensus, antisense orientation.<br>Used in RT-qPCR experiments to assess the collective expression of human interferon alpha genes. All 3 primers were used in a single reaction.                                                                                                                                                                          |
| Primer set 11 | MDIFNB1FW<br>MDIFNB1RV                              | ACGCCGCATTGACCATCTAT<br>GTCTCATTCCAGCCAGTGCT                             | <i>IFNB1</i> , sense orientation.<br><i>IFNB1</i> , antisense orientation.                                                                                                                                                                                                                                                                                                                                                                                                            |

|               |                            |                                                              |                                                                                                                                                                                                          |
|---------------|----------------------------|--------------------------------------------------------------|----------------------------------------------------------------------------------------------------------------------------------------------------------------------------------------------------------|
|               |                            |                                                              | Used for RT-qPCR of the mRNA of the <i>IFNB1</i> gene (NM_002176).                                                                                                                                       |
| Primer set 12 | MDHSRB1AF<br>MDHSRB1AR     | ACTCTCACCTCCCATGTTGC<br>ATCCGTGCACTCCTGTTCTG                 | <i>RB1</i> , sense orientation.<br><i>RB1</i> , antisense orientation.<br>Used for RT-qPCR of the mRNA of the <i>RB1</i> gene (NM_000321). Primers span an intron.                                       |
| Primer set 13 | MDHSP107AF<br>MDHSP107AR   | CCAAGAAGCGCTCTGCTGTA<br>GCAGGGGATTCTGCATCACTA                | <i>RBL1</i> , sense orientation.<br><i>RBL1</i> , antisense orientation.<br>Used for RT-qPCR of the mRNA of the <i>RBL1</i> gene (NM_0028955). Primers span an intron.                                   |
| Primer set 14 | MDHSP130F<br>MDHSP130R     | AGTCGCCCACCCCTCAGAT<br>TTCCCTCCAGCGTGTAGCTT                  | <i>RBL2</i> , sense orientation.<br><i>RBL2</i> , antisense orientation.<br>Used for RT-qPCR of the mRNA of the <i>RBL2</i> gene (NM_005611). Primers span an intron.                                    |
| Primer set 15 | MDTRET1CDSF<br>MDTRET1CDSE | TCCCCTTCGGATCTTAACAC<br>CGAAAAAGATGAGGGTCTGC                 | <i>TREX1</i> , sense orientation.<br><i>TREX1</i> , antisense orientation.<br>Used for RT-qPCR of the mRNA of the <i>TREX1</i> gene (NM_007248). Primers span an intron.                                 |
| Primer set 16 | MDHSFOXA1F<br>MDHSFOXA1R   | GGAAGACCGGCCAGCTAGAG<br>TGAAGGAGTAGTGGGGGTCC                 | <i>FOXA1</i> , sense orientation.<br><i>FOXA1</i> , antisense orientation.<br>Used for RT-qPCR of the mRNA of the <i>FOXA1</i> gene (NM_004496). Primers span an intron.                                 |
| Primer set 17 | JJMMP1FW<br>JJMMP1RV       | AGCCTTCCAACCTCTGGAGTAATG<br>T<br>CCGATGATCTCCCCTGACAA        | <i>MMP1</i> , sense orientation.<br><i>MMP1</i> , antisense orientation.<br>Used for RT-qPCR of the mRNA of the <i>MMP1</i> gene (NM_001145938). Primers span an intron.                                 |
| Primer set 18 | JJMMP3FW<br>JJMMP3RV       | CCCACCTTACATACAGGATTGTG<br>A<br>CCCAGACTTTCAGAGCTTTCTCA      | <i>MMP3</i> , sense orientation.<br><i>MMP3</i> , antisense orientation.<br>Used for RT-qPCR of the mRNA of the <i>MMP3</i> gene (NM_002422). Primers span an intron.                                    |
| Primer set 19 | JJIL6FW<br>JJIL6RV         | CACTGGCAGAAAACAACCTGAA<br>ACCAGGCAAGTCTCCTCATTGA             | <i>IL6</i> , sense orientation.<br><i>IL6</i> , antisense orientation.<br>Used for RT-qPCR of the mRNA of the <i>IL6</i> gene (NM_000600). Primers span an intron.                                       |
| Primer set 20 | JJIL8FW<br>JJIL8RV         | GTTTTTGAAGAGGGCTGAGAATT<br>C<br>CCCTACAACAGACCCACACAATA<br>C | <i>CXCL8 (IL8)</i> , sense orientation.<br><i>CXCL8 (IL8)</i> , antisense orientation.<br>Used for RT-qPCR of the mRNA of the <i>CXCL8</i> gene (NM_000584). Primers span an intron.                     |
| Primer set 21 | JJCL2FW<br>JJCL2RV         | AAGACCATTGTGGCCAAGGA<br>TTCGGAGTTTGGGTTTGCT                  | <i>CCL2</i> , sense orientation.<br><i>CCL2</i> , antisense orientation.<br>Used for RT-qPCR of the mRNA of the <i>CCL2</i> gene (NM_002982). Primers span an intron.                                    |
| Primer set 22 | JJXCL2FW<br>JJXCL2RV       | AGAATGGGCAGAAAGCTTGCT<br>CCTTCTGGTCAGTTGGATTGTC              | <i>CXCL2</i> , sense orientation.<br><i>CXCL2</i> , antisense orientation.<br>Used for RT-qPCR of the mRNA of the <i>CXCL2</i> gene (NM_002089). Primers span an intron.                                 |
| Primer set 23 | IL1BETA FW<br>IL1BETA RV   | CGCCAGTAAAATGATGGCTTAT<br>CTGGAAGGAGCACTTCATCTGT             | <i>IL-1<math>\beta</math></i> , sense orientation.<br><i>IL-1<math>\beta</math></i> , antisense orientation.<br>Used for RT-qPCR of the mRNA of the <i>IL1B</i> gene (NM_000576). Primers span an intron |
| Primer set 24 | MDIRF9FW<br>MDIRF9RV       | CAACTGAGGCCCTTTCAA<br>CGCCCGTTGTAGATGAAGGT                   | <i>IRF9</i> , sense orientation.<br><i>IRF9</i> , antisense orientation.<br>Used for RT-qPCR of the mRNA of the <i>IRF9</i> gene (NM_006084). Primers span an intron                                     |
| Primer set 25 | MDIRF7FW                   | GGCTGGAAAACCAACTCCG                                          | <i>IRF7</i> , sense orientation.                                                                                                                                                                         |

|               |                                                             |                                                    |                                                                                                                                                                                                                                                                            |
|---------------|-------------------------------------------------------------|----------------------------------------------------|----------------------------------------------------------------------------------------------------------------------------------------------------------------------------------------------------------------------------------------------------------------------------|
|               | MDIRF7RV                                                    | GTTATCCCGCAGCATCACGA                               | <i>IRF7</i> , antisense orientation.<br>Used for RT-qPCR of the mRNA of the <i>IRF7</i> gene (NM_001572). Primers span an intron                                                                                                                                           |
| Primer set 26 | MDHSOAS1AF<br>MDHSOAS1AR                                    | TGGAGACCCAAAGGGTTGGA<br>AGGAAGCAGGAGGTCTCACC       | <i>OAS1</i> , sense orientation.<br><i>OAS1</i> , antisense orientation.<br>Used for RT-qPCR of the mRNA of the <i>OAS1</i> gene (NM_016816). Primers span an intron                                                                                                       |
| Primer set 27 | HSCGASFW<br>HSCGASRV                                        | ACGTGCTGTGAAAACAAAGAAG<br>GTCCCACTGACTGTCTTGAGG    | <i>cGAS</i> , sense orientation.<br><i>cGAS</i> , antisense orientation.<br>Used for RT-qPCR of the mRNA of the <i>MB21D1</i> gene (NM_138441). Primers span an intron                                                                                                     |
| Primer set 28 | HSSTING1FW<br>HSSTING1RV                                    | ATATCTGCGGCTGATCCTGC<br>GGTCTGCTGGGGCAGTTTAT       | <i>STING</i> , sense orientation.<br><i>STING</i> , antisense orientation.<br>Used for RT-qPCR of the mRNA of the <i>TMEM173</i> gene (NM_198282). Primers span an intron                                                                                                  |
| Primer set 29 | TICDKN1AFW<br>TICDKN1ARV                                    | GAGACTCTCAGGGTCGAAAACG<br>TTCCTGTGGGCGGATTAGG      | <i>CDKN1A</i> , sense orientation.<br><i>CDKN1A</i> , antisense orientation.<br>Used for RT-qPCR of the mRNA of the <i>CDKN1A</i> gene (NM_000389). Primers span an intron                                                                                                 |
| Primer set 30 | TICDKN2AFW<br>TICDKN2ARV                                    | CGGAAGGTCCCTCAGACATC<br>CCCTGTAGGACCTTCGGTGA       | <i>CDKN2A (p16)</i> , sense orientation.<br><i>CDKN2A (p16)</i> , antisense orientation.<br>Used for RT-qPCR of the mRNA of the <i>CDKN2A</i> gene (NM_000077). Primers span an intron                                                                                     |
| Primer set 31 | MGAPDHF<br>MGAPDHR                                          | CGGCCGCATCTTCTTG TG<br>GTGACCAGGCGCCCAATA          | <i>Gapdh</i> , sense orientation.<br><i>Gapdh</i> , antisense orientation.<br>Used for RT-qPCR of the mRNA of the <i>Gapdh</i> gene (NM_008084.3). Primers span an intron. Used as the internal normalizer in gene expression experiments.                                 |
| Primer set 32 | MMHSP90AB1F<br>MMHSP90AB1R                                  | CCACCACCCTGCTCTGTA<br>CCTCTCCATGGTGCACTTCC         | <i>Hsp90ab1</i> , sense orientation.<br><i>Hsp90ab1</i> , antisense orientation.<br>Used for RT-qPCR of the mRNA of the <i>Hsp90ab1</i> gene (NM_008302). Primers span an intron. Used as secondary normalizer in gene expression experiments.                             |
| Primer set 33 | MMGUSBFW<br>MMGUSBRV                                        | CGTGACCTTTGTGAGCAACG<br>CTGCTCCATACTCGCTCTGG       | <i>Gusb</i> , sense orientation.<br><i>Gusb</i> , antisense orientation.<br>Used for RT-qPCR of the mRNA of the <i>Gusb</i> gene (NM_010368). Primers span an intron. Used as secondary normalizer in gene expression experiments.                                         |
| Primer set 34 | GBCONIFNAF<br>GBCONIFNAR                                    | TCTGATGCAGCAGGTGGG<br>AGGGCTCTCCAGACTTCTGCTCT<br>G | Interferon alpha consensus, sense orientation.<br>Interferon alpha consensus, antisense orientation.<br>Used in RT-qPCR experiments to assess the collective expression of murine interferon alpha genes. Primers were developed and validated as described <sup>4</sup> . |
| Primer set 35 | GBIRF7FW<br>GBIRF7RV                                        | CTCCTGAGCGCAGCCTTG<br>GTTCTTACTGCTGGGGCCAT         | <i>Irf7</i> , sense orientation.<br><i>Irf7</i> , antisense orientation.<br>Used for RT-qPCR of the mRNA of the <i>Irf7</i> gene (NM_016850). Primers span an intron.                                                                                                      |
| Primer set 36 | MMOAS1BF<br>MMOAS1BR                                        | TCTGCTTATGGGGCTTCGG<br>TCGACTCCATACTCCCAGG         | <i>Oas1</i> , sense orientation.<br><i>Oas1</i> , antisense orientation.<br>Used for RT-qPCR of the mRNA of the <i>Irf9</i> gene (NM_001083925). Primers span an intron.                                                                                                   |
| Primer set 37 | JKLINE1FW<br>JKLINE1RV<br>Amplicon W, Ext.<br>Data Fig. 6f. | CTGCCTTGAAGAAGAGAGC<br>AGTGCTGCGTTCTGATGATG        | Murine LINE-1 5'UTR, positions 392-412, sense orientation.<br>Murine LINE-1 5'UTR, 596-616, antisense orientation.<br>Used in RT-qPCR experiments to assess expression of murine L1 RNA.                                                                                   |
| Primer set 38 | P16MouseF<br>P16MouseR                                      | CCAGGGCCGTGTGCAT<br>TACGTGAACGTTGCCATCA            | <i>Cdkn2a</i> , sense orientation.<br><i>Cdkn2a</i> , antisense orientation.                                                                                                                                                                                               |

|               |                                                                 |                                                        |                                                                                                                                                                                                           |
|---------------|-----------------------------------------------------------------|--------------------------------------------------------|-----------------------------------------------------------------------------------------------------------------------------------------------------------------------------------------------------------|
|               |                                                                 |                                                        | Used for RT-qPCR of the mRNA of the <i>Cdkn2a</i> gene (NM_009877). Primers span an intron.                                                                                                               |
| Primer set 39 | GBMMP3FW<br>GBMMP3RV                                            | GACTCAAGGGTGGATGCTGT<br>CCAACCTGCCAAGATCCACTG          | <i>Mmp3</i> , sense orientation.<br><i>Mmp3</i> , antisense orientation.<br>Used for RT-qPCR of the mRNA of the <i>Mmp3</i> gene (NM_0108209). Primers span an intron.                                    |
| Primer set 40 | GBIL6FW<br>GBIL6RV                                              | CGGAGAGGAGACTTCACAGAGG<br>A<br>TTTCCACGATTTCCCAGAGAACA | <i>Il-6</i> , sense orientation.<br><i>Il-6</i> , antisense orientation.<br>Used for RT-qPCR of the mRNA of the <i>Il6</i> gene (NM_031168). Primers span an intron.                                      |
| Primer set 41 | MMPAI1FW<br>MMPAI1RV                                            | GGAAGGGCAACATGACCAGG<br>AGCTGCTCTTGGTCGGAAAG           | <i>Pai1</i> , sense orientation.<br><i>Pai1</i> , antisense orientation.<br>Used for RT-qPCR of the mRNA of the <i>Pai1</i> gene (NM_008871). Primers span an intron.                                     |
| Primer set 42 | APACACAF<br>APACACAR                                            | CTGGCTGCATCCATTATGTCA<br>TGGTAGACTGCCCGTGTGAA          | <i>Acaca</i> , sense orientation.<br><i>Acaca</i> , antisense orientation.<br>Used for RT-qPCR of the mRNA of the <i>Acaca</i> gene (NM_133360). Primers span an intron.                                  |
| Primer set 43 | APFASNF<br>APFASNR                                              | CTGCGTGGCTATGATTATGG<br>AGGTTGCTGCTGTCTGTAGT           | <i>Fasn</i> , sense orientation.<br><i>Fasn</i> , antisense orientation.<br>Used for RT-qPCR of the mRNA of the <i>Fasn</i> gene (NM_007988). Primers span an intron.                                     |
| Primer set 44 | APSREBF1F<br>APSREBF1R                                          | ACTTTTCCTTAACGTGGGCCT<br>CATCTCGCCAGTGTCTGTT           | <i>Srebf1</i> , sense orientation.<br><i>Srebf1</i> , antisense orientation.<br>Used for RT-qPCR of the mRNA of the <i>Srebf1</i> gene (NM_011480). Primers span an intron.                               |
| Primer set 45 | APCEBPAF<br>APCEBPAR                                            | TTCGGGTCGCTGGATCTCTA<br>TCAAGGAGAAACCACCACGG           | <i>C/EBP<math>\alpha</math></i> , sense orientation.<br><i>C/EBP<math>\alpha</math></i> , antisense orientation.<br>Used for RT-qPCR of the mRNA of the <i>C/EBP<math>\alpha</math></i> gene (NM_007678). |
| Primer set 46 | APACACBF<br>APACACBR                                            | AGAAGCGAGCACTGCAAGGTTG<br>GGAAGATGGACTCCACCTGGTT       | <i>Acacb</i> , sense orientation.<br><i>Acacb</i> , antisense orientation.<br>Used for RT-qPCR of the mRNA of the <i>Acacb</i> gene (NM_133904). Primers span an intron.                                  |
| Primer set 47 | APPPARGF<br>APPPARGR                                            | TTCGCTGATGCACTGCCTAT<br>GGAATGCGAGTGGTCTTCCA           | <i>Pparg</i> , sense orientation.<br><i>Pparg</i> , antisense orientation.<br>Used for RT-qPCR of the mRNA of the <i>Pparg</i> gene (NM_011146). Primers span an intron.                                  |
| Primer set 48 | MDMML1ORF1F<br>MDMML1ORF1R<br>Amplicon X, Ext.<br>Data Fig. 6f. | ATCTGTCTCCCAGGTCTGCT<br>TCCTCCGTTTACCTTTCCGCC          | Murine LINE-1 ORF1, positions 1341-1360, sense orientation.<br>Murine LINE-1 ORF1, positions 1460-1441, antisense orientation.<br>Used in RT-qPCR experiments to assess expression of murine L1 RNA.      |
| Primer set 49 | MDMML1ORF2F<br>MDMML1ORF2R<br>Amplicon Y, Ext.<br>Data Fig. 6f. | GCTTCGGTGAAGTAGCTGGA<br>TTCGTTAGATCACGCCGAG            | Murine LINE-1 ORF2, positions 4786-4805, sense orientation.<br>Murine LINE-1 ORF2, positions 4939-4920, antisense orientation.<br>Used in RT-qPCR experiments to assess expression of murine L1 RNA.      |
| Primer set 50 | MDMML13UTRF<br>MDMML13UTRR<br>Amplicon Z, Ext.<br>Data Fig. 6f. | AGCCAAATGGATGGACCTGG<br>AAGGAGGGGCATAGTGTCCA           | Murine LINE-1 3'UTR, positions 6344-6363, sense orientation.<br>Murine LINE-1 3'UTR, positions 6538-6519, antisense orientation.<br>Used in RT-qPCR experiments to assess expression of murine L1 RNA.    |
| Primer set 51 | MDMML1TFF<br>MDMML1TFR                                          | ATCCGGACCAGAGGACAGG<br>ATGGCGACCGCTGCTG                | Murine LINE-1 5'UTR sense orientation.<br>Murine LINE-1 5'UTR, antisense orientation.<br>Primers amplify one of the polymorphisms of L1Tf(I-III) families.                                                |

|               |                          |                                              |                                                                                                                                                              |
|---------------|--------------------------|----------------------------------------------|--------------------------------------------------------------------------------------------------------------------------------------------------------------|
| Primer set 52 | MDMML1MDNF<br>MDMML1MDNR | AGAGAACCGGACCCAATCCA<br>GCTTGTGCCCTACTCAGAC  | Murine LINE-1 5'UTR sense orientation.<br>Murine LINE-1 5'UTR, antisense orientation.<br>Primers amplify one of the polymorphisms of L1MdN(I) families.      |
| Primer set 53 | MDMML1MDAF<br>MDMML1MDAF | TCCCCACGGGATCCTAAGAC<br>CTCTGCAGGCAAGCTCTCTT | Murine LINE-1 5'UTR sense orientation.<br>Murine LINE-1 5'UTR, antisense orientation.<br>Primers amplify one of the polymorphisms of L1MdA(IV-VII) families. |

<sup>1</sup> All sequences are listed in the 5'→3' orientation. Primer sets 1–30 are specific for the listed human genes; primer sets 31–53 are murine-specific.

<sup>2</sup> All LINE-1 positions are relative to the L1Hs consensus sequence (Rebase, <http://www.girinst.org/rebase/>).

<sup>3</sup> See reference #16 (Coufal *et al.*, 2009).

<sup>4</sup> See reference #41 (Gautier *et al.*, 2005).

## Supplementary Table 2: List of antibodies

| Antibody               | Antibody species | Vendor                                         | Catalog Number   | Application                        |
|------------------------|------------------|------------------------------------------------|------------------|------------------------------------|
| GAPDH                  | Rabbit           | Cell Signaling                                 | 5174             | Loading control for immunoblotting |
| GAPDH                  | Mouse            | Sigma                                          | G8795            | Loading control for immunoblotting |
| p16                    | Mouse            | Santa Cruz                                     | sc-756           | Immunoblotting                     |
| p16                    | Mouse            | Santa Cruz                                     | sc-56330 (JC8)   | Immunofluorescence                 |
| p21                    | Rabbit           | Santa Cruz                                     | sc-397           | Immunoblotting                     |
| RB1                    | Mouse            | BD Biosciences                                 | 554136           | Immunoblotting, ChIP               |
| TREX1                  | Rabbit           | Cell Signaling                                 | 12215            | Immunoblotting                     |
| FOXA1                  | Rabbit           | Abcam                                          | ab170933         | Immunoblotting                     |
| FOXA1                  | Goat             | Abcam                                          | ab5089           | ChIP                               |
| Phospho-STAT1 (Tyr701) | Mouse            | Santa Cruz                                     | sc-8394          | Immunofluorescence                 |
| Phospho-STAT2 (Tyr689) | Mouse            | Millipore                                      | 07-224           | Immunofluorescence                 |
| STAT2                  | Rabbit           | Cell Signaling                                 | 4594S            | Immunoblotting                     |
| IRF7                   | Rabbit           | Abcam                                          | ab109255         | Immunoblotting                     |
| IRF9                   | Rabbit           | Novus Bio                                      | NBP2-16991       | Immunofluorescence                 |
| BrdU                   | Mouse            | BD Biosciences                                 | 555627           | Immunofluorescence                 |
| $\gamma$ -H2AX         | Mouse            | Millipore                                      | 05-636           | Immunofluorescence                 |
| F4/80                  | Rat              | Abcam                                          | ab6640 (Cl:A3-1) | Immunofluorescence                 |
| ssDNA                  | Mouse            | Enzo                                           | MAb F7-26        | Immunofluorescence                 |
| DNA-RNA hybrids        | Mouse            | Kerafast                                       | ENH001 (S9.6)    | Immunofluorescence                 |
| LaminB1                | Goat             | Santa Cruz                                     | Sc-6216 (C-20)   | Immunofluorescence                 |
| IL-6                   | Rabbit           | Cell Signaling                                 | 12912            | Immunofluorescence                 |
| Human LINE-1 ORF1      | Rabbit           | Gift of K.H. Burns, Johns Hopkins <sup>1</sup> |                  | Immunofluorescence                 |
| Mouse LINE-1 Orf1      | Rabbit           | J.D. Boeke, abEA02 (RabMAb clone NYU-2-1_2)    |                  | Immunofluorescence                 |

<sup>1</sup> See reference #4

**Supplementary Table 3: List of expressed L1 elements identified by long range RT-PCR**

See Excel file: Table\_S3.xlsx

**Supplementary Table 4a: Gene list used in GSEA for SASP (85 genes)**

**Supplementary Table 4b: Gene list used in GSEA for IFN-I (50 genes)**

See Excel file: Table\_S4.xlsx

**Supplementary Table 5a: GSEA analysis of KEGG pathways comparing early passage with early senescence**

**Supplementary Table 5b: GSEA analysis of KEGG pathways comparing early passage with late senescence**

**Supplementary Table 5c: GSEA analysis of KEGG pathways comparing early senescence with late senescence**

See Excel file: Table\_S5.xlsx



**Supplementary Table 6: Summary of Qiagen PCR array analysis**

|                                             | SEN (L) cells   |                      | 3X cells        |                      |
|---------------------------------------------|-----------------|----------------------|-----------------|----------------------|
|                                             | Number of genes | Percent <sup>1</sup> | Number of genes | Percent <sup>1</sup> |
| Total genes                                 | 84              | 100%                 | 84              | 100%                 |
| Upregulated genes                           | 77              | 92%                  | 80              | 95%                  |
| Downregulated genes                         | 7               | 8%                   | 4               | 5%                   |
| Changing genes passing filters <sup>2</sup> | 58              | 69%                  | 44              | 52%                  |
| Passing genes upregulated                   | 57              | 68%                  | 44              | 52%                  |
| Passing genes downregulated                 | 1               | 1%                   | 0               | 0%                   |
| Changing genes failing filters              | 26              | 31%                  | 40              | 48%                  |
| Genes passing filters, unique <sup>3</sup>  | 23              | 27%                  | 9               | 11%                  |
| Genes passing filters, overlap <sup>4</sup> | 35              | 42%                  | 35              | 42%                  |
| Genes passing filters, total <sup>5</sup>   | 67              | 80%                  | 67              | 80%                  |

<sup>1</sup> All percentages are calculated with respect to the total number of genes (84) found on the array. Data for all 84 genes displayed as scatter plots are shown in Fig. 2h.

<sup>2</sup> The sum of upregulated and downregulated genes that pass a set of significance filters, see Methods for definitions of filters.

<sup>3</sup> Changing genes that pass the significance filters that are unique to either SEN (L) or 3X cells.

<sup>4</sup> Changing genes that pass the significance filters that are common to (found in both) SEN (L) and 3X cells.

<sup>5</sup> Changing genes that pass the significance filters that are found in SEN (L) and/or 3X cells. The heatmap representation for this set of genes (67) is shown in Extended Fig. 4j, k.

**Supplementary Table 7: Summary of mouse tissue RT-qPCR data for L1, p16, IFN-I and SASP genes**

See Excel file: Table\_S7.xlsx
