# Supplementary material
Source: PubMed Central journal article supplement (PMC6519963)
Supplement: NIHMS1511524-supplement-SI_Guide.pdf [file NIHMS1511524-supplement-SI_Guide.pdf]

## List of Supplementary Items

Fig. 1: Raw immunoblot scans

Table 1: List of primers used in PCR analysis

Table 2: List of antibodies

Table 3: List of expressed L1 elements identified by long range RT-PCR  
Excel file: Table\_S3.xlsx

Table 4a: Gene list used in GSEA for SASP (85 genes)

Table 4b: Gene list used in GSEA for IFN-I (50 genes)  
Excel file: Table\_S4.xlsx

Table 5a: GSEA analysis of KEGG pathways comparing early passage with early senescence

Table 5b: GSEA analysis of KEGG pathways comparing early passage with late senescence

Table 5c: GSEA analysis of KEGG pathways comparing early senescence with late senescence  
Excel file: Table\_S5.xlsx

Table 6: Summary of Qiagen PCR array analysis

Table 7: Summary of mouse tissue RT-qPCR data for L1, p16, IFN-I and SASP genes  
Excel file: Table\_S7.xlsx
