# Supplementary material
Source: PubMed Central journal article supplement (PMC6519963)
Supplement: NIHMS1511524-supplement-Supplementary_Figure_1.pdf [file NIHMS1511524-supplement-Supplementary_Figure_1.pdf]

a Blot 1  
RB1

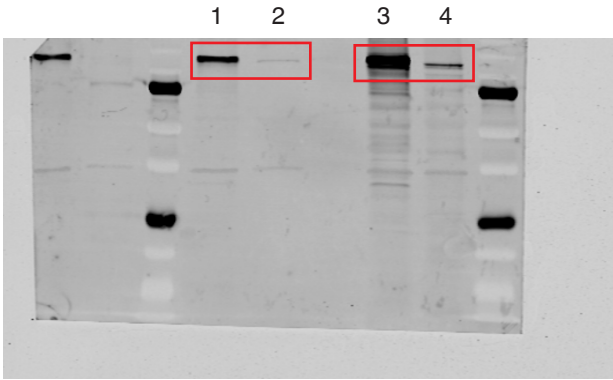

GAPDH

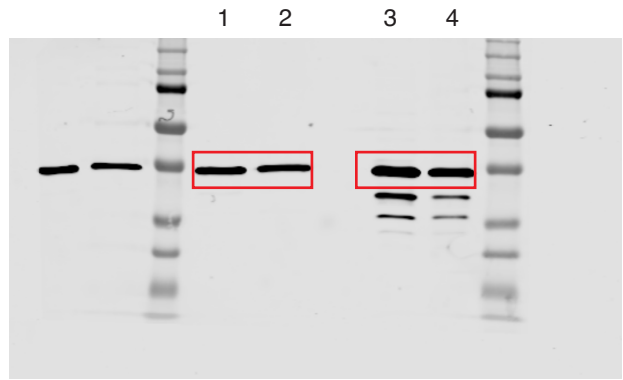

b Blot 2  
TREX1

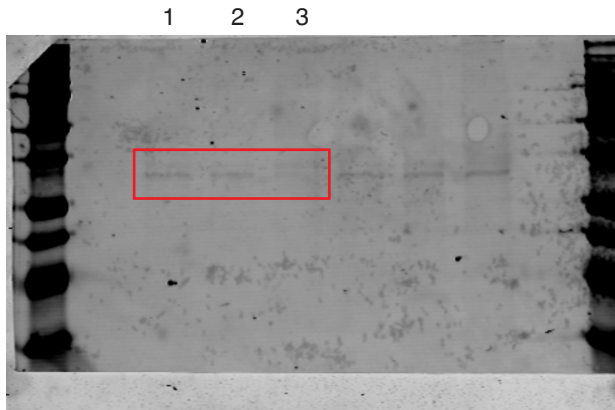

GAPDH

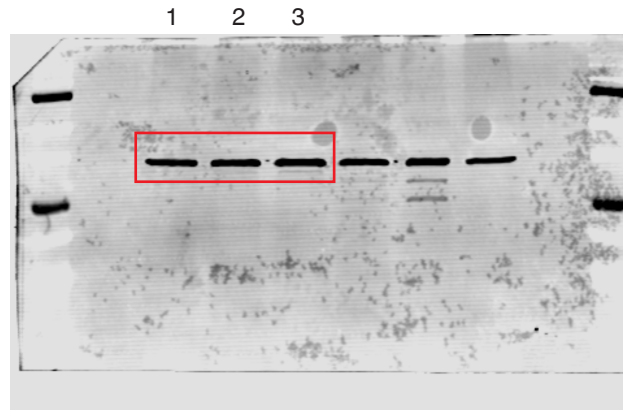

b Blot 3  
FOXA1

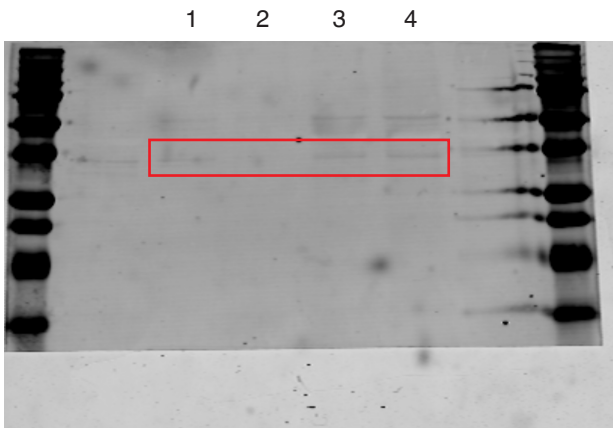

GAPDH

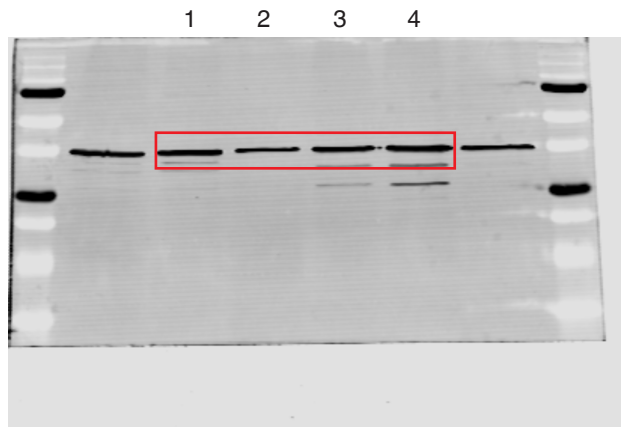

d Blot 4  
FOXA1

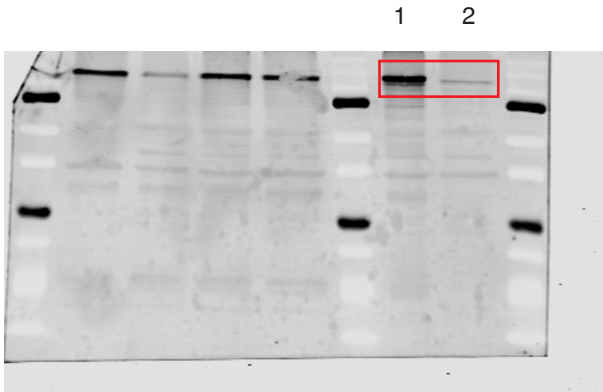

GAPDH

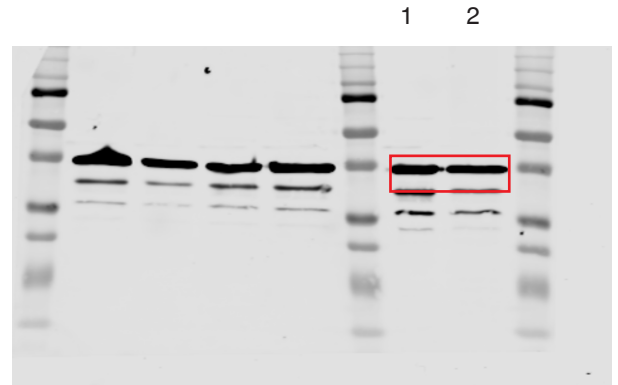

e Blot 5  
TREX1

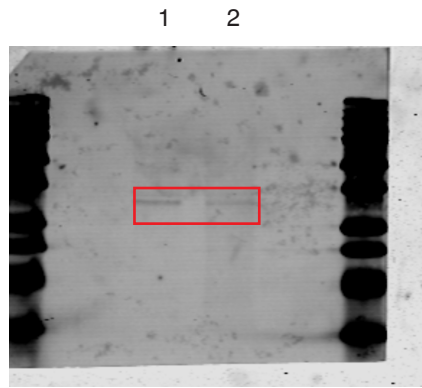

GAPDH

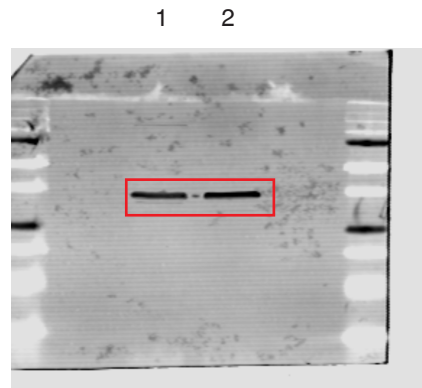

f Blot 6  
FOXA1

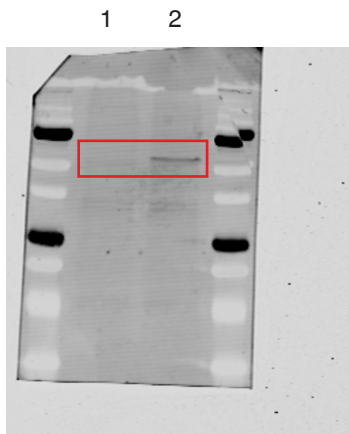

GAPDH

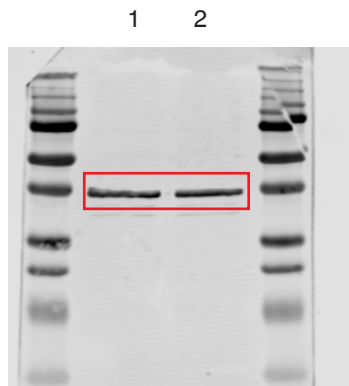

9 Blot 7  
RB1

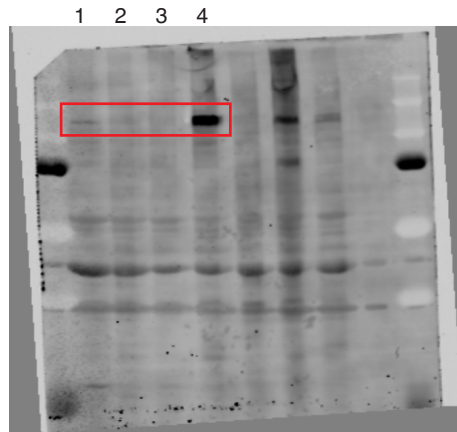

GAPDH

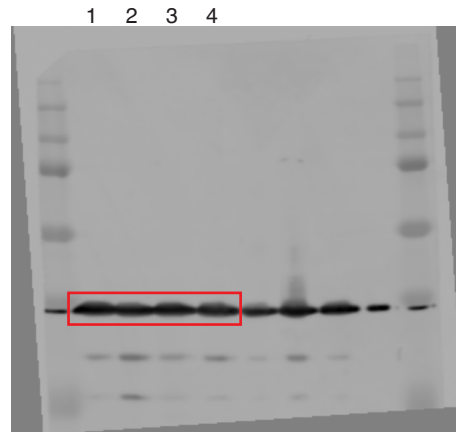

h Blot 8  
TREX1

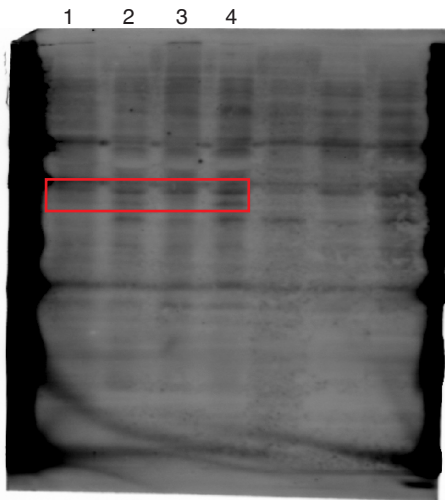

GAPDH

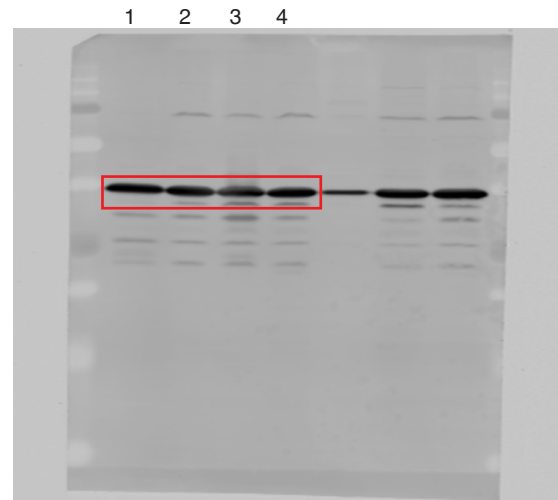

i Blot 9  
FOXA1

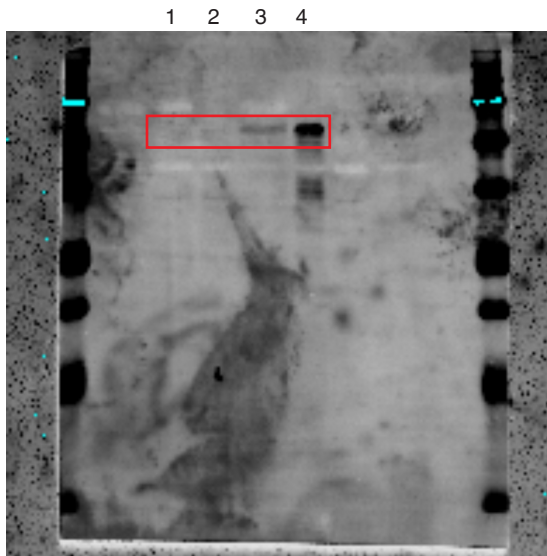

GAPDH

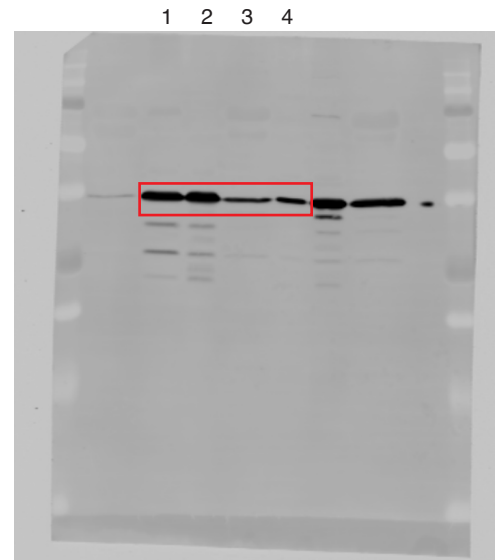

j Blot 10  
STAT2

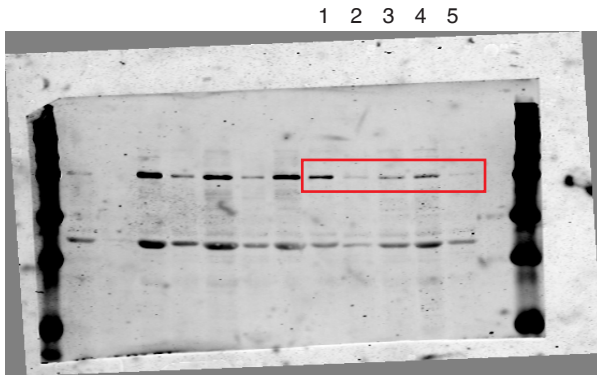

GAPDH

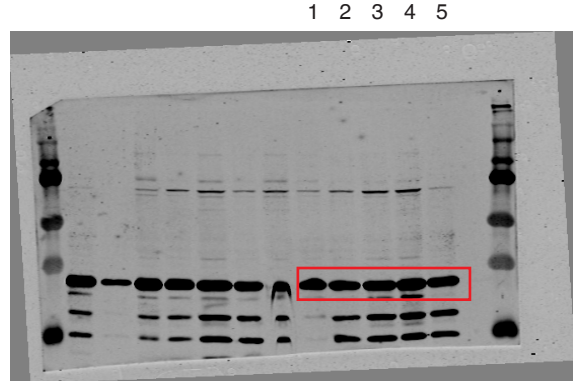

k Blot 11  
IRF7

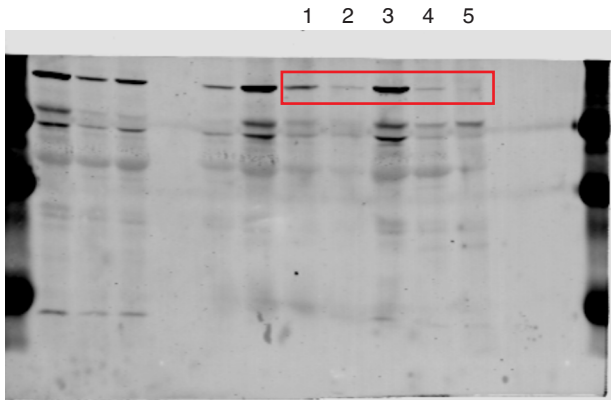

GAPDH

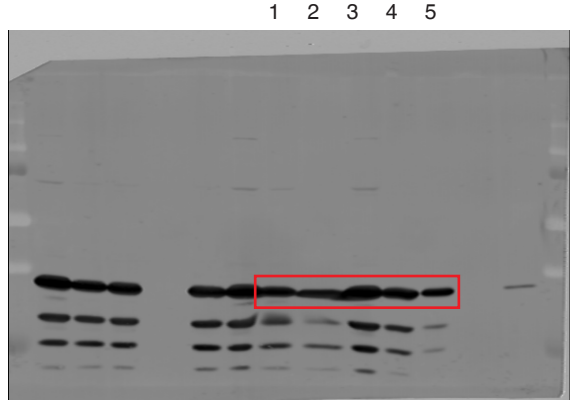

l Blot 12  
STAT2

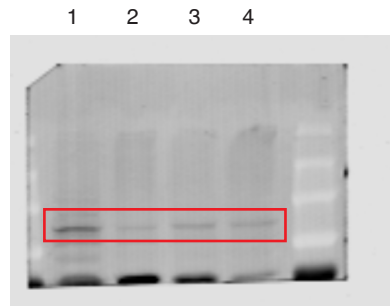

GAPDH

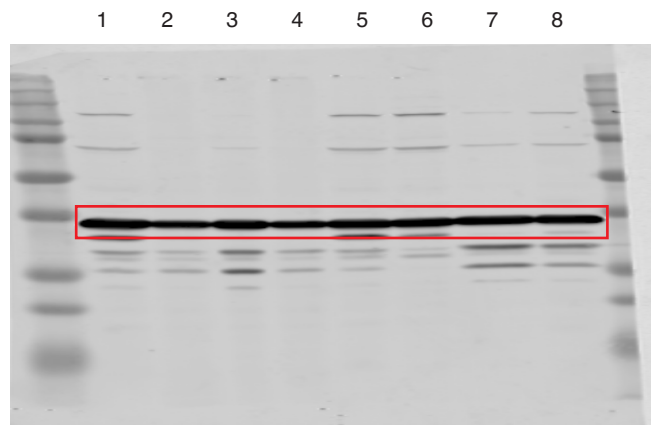

m Blot 13  
IRF7

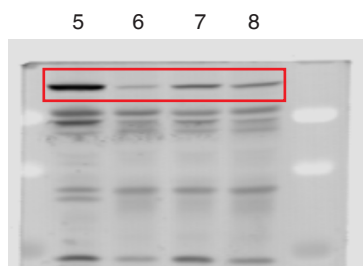



n Blot 14  
p16

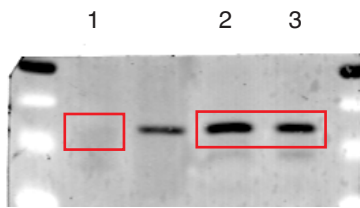

GAPDH

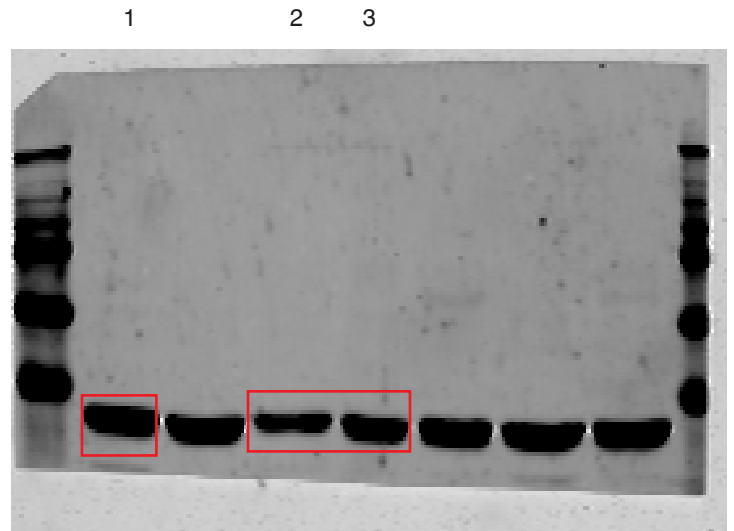

o Blot 15  
p21

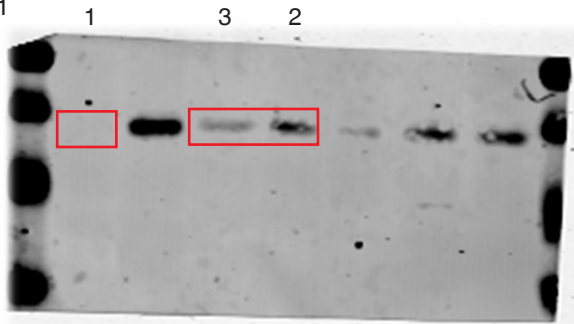

- a, Blot 1 - RB1: 1. EP; 2. SEN (L); 3. OE - SEN; 4. SEN (E)
- b, Blot 2 - TREX1: 1. EP; 2. SEN (E); 3. SEN (L)
- c, Blot 3 - FOXA1: 1. EP; 2. Arrest; 3. SEN (E); 4. SEN (L)
- d, Blot 4 - RB1: 1. EP; 2. 3X
- e, Blot 5 - TREX1: 1. EP; 2. 3X
- f, Blot 6 - FOXA1: 1. EP; 2. 3X
- g, Blot 7 - RB1: 1. SEN (L); 2. shRB1(b); 3. shRB1(a); 4. OE-RB1
- h, Blot 8 - TREX1: 1. SEN (L); 2. shTREX1 (b); 3. shTREX1 (a); 4. OE-TREX1
- i, Blot 9 - FOXA1: 1. shFOXA1 (a); 2. shFOXA1 (b); 3. SEN (L); 4. OE-FOXA1
- j, Blot 10 - STAT2: 1. 3X; 2. shL1; 3. NRTI; 4.  $\Delta$ IFNAR; 5. EP
- k, Blot 11 - IRF7: 1. EP; 2. shL1; 3. 3X; 4. shL1; 5.  $\Delta$ IFNAR
- l, Blot 12 - STAT2: 1. SEN (L); 2.  $\Delta$ IFNAR; 3. shL1; 4. NRTI
- m, Blot 13 - IRF7: 5. SEN (L); 6.  $\Delta$ IFNAR; 7. shL1; 8. NRTI
- n, Blot 14 - p16 (CDKN2A): 1. EP; 2. SEN (E); 3. SEN (L)
- o, Blot 15 - p21 (CDKN1A): 1. EP; 2. SEN (E); 3. SEN (L)
